# Supplementary material
Source: PubMed Central journal article supplement (PMC5982131)
Supplement: jgv-99-549-s001.pdf [file jgv-99-549-s001.pdf]

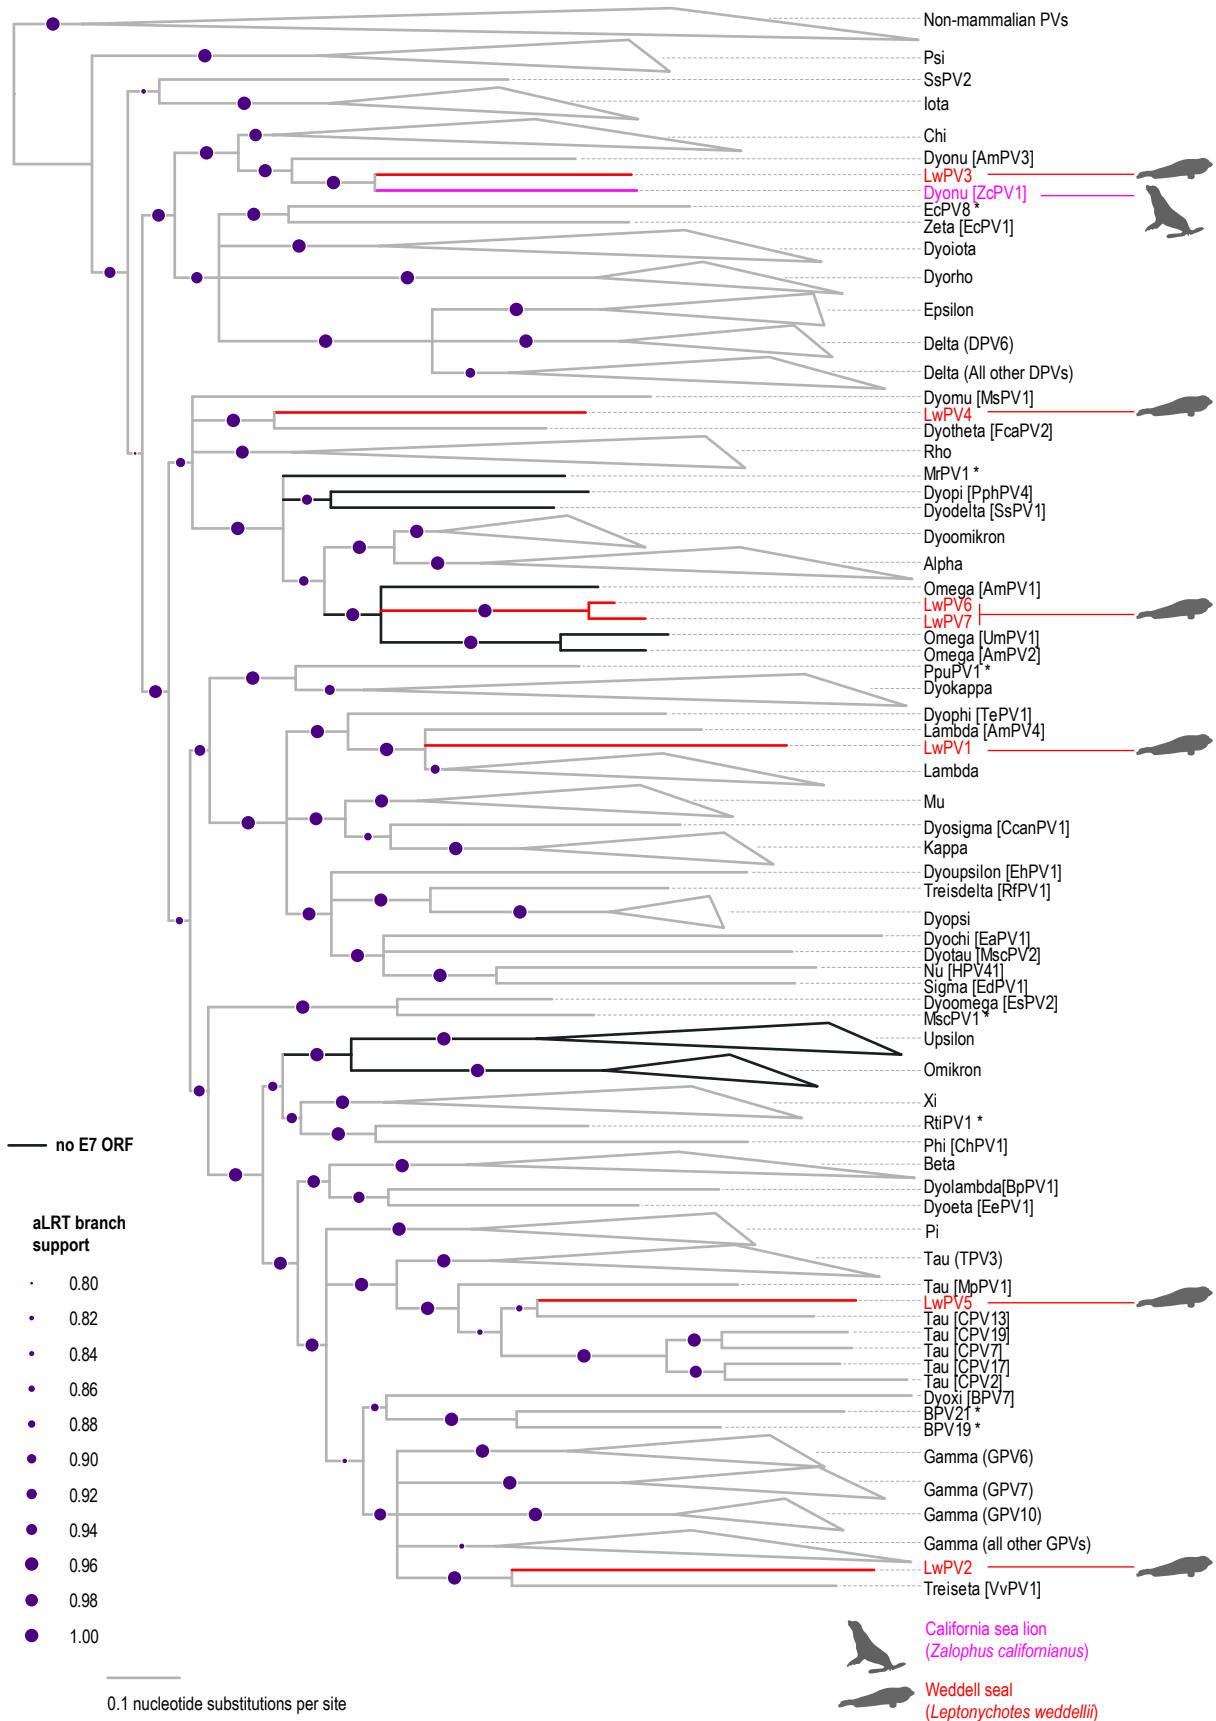

**Supplementary Figure 1:** Maximum likelihood tree based on L1 nucleotide sequence using the best-fit model GTR+I+G4. LwPV1-7 highlighted in red, with red branch showing lineage, California sea lion papillomavirus ZcPV1 highlighted in pink, with pink branch showing lineage. Branches in black indicated lineages absent of E7 gene. Branch support values indicated in blue circle size gradient. Branches with < 0.75 aLRT branch support were collapsed. Papillomaviruses marked with asterisk have yet to be classified by ICTV.

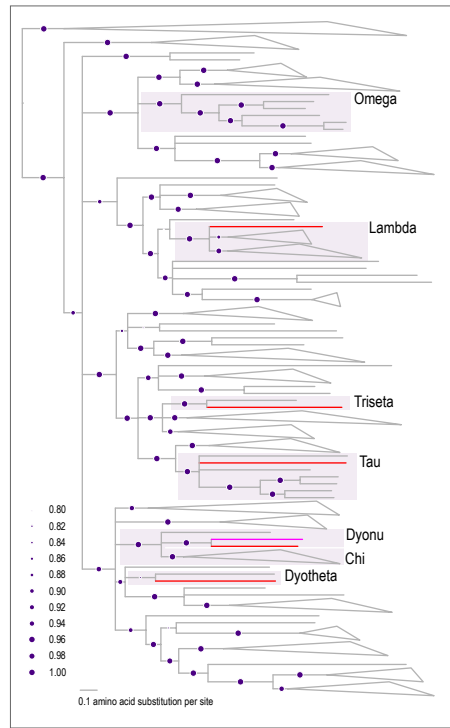

**aLRT branch support**

- 0.80
- 0.82
- 0.84
- 0.86
- 0.88
- 0.90
- 0.92
- 0.94
- 0.96
- 0.98
- 1.00

 California sea lion  
(*Zalophus californianus*)

 Weddell seal  
(*Leptonychotes weddellii*)

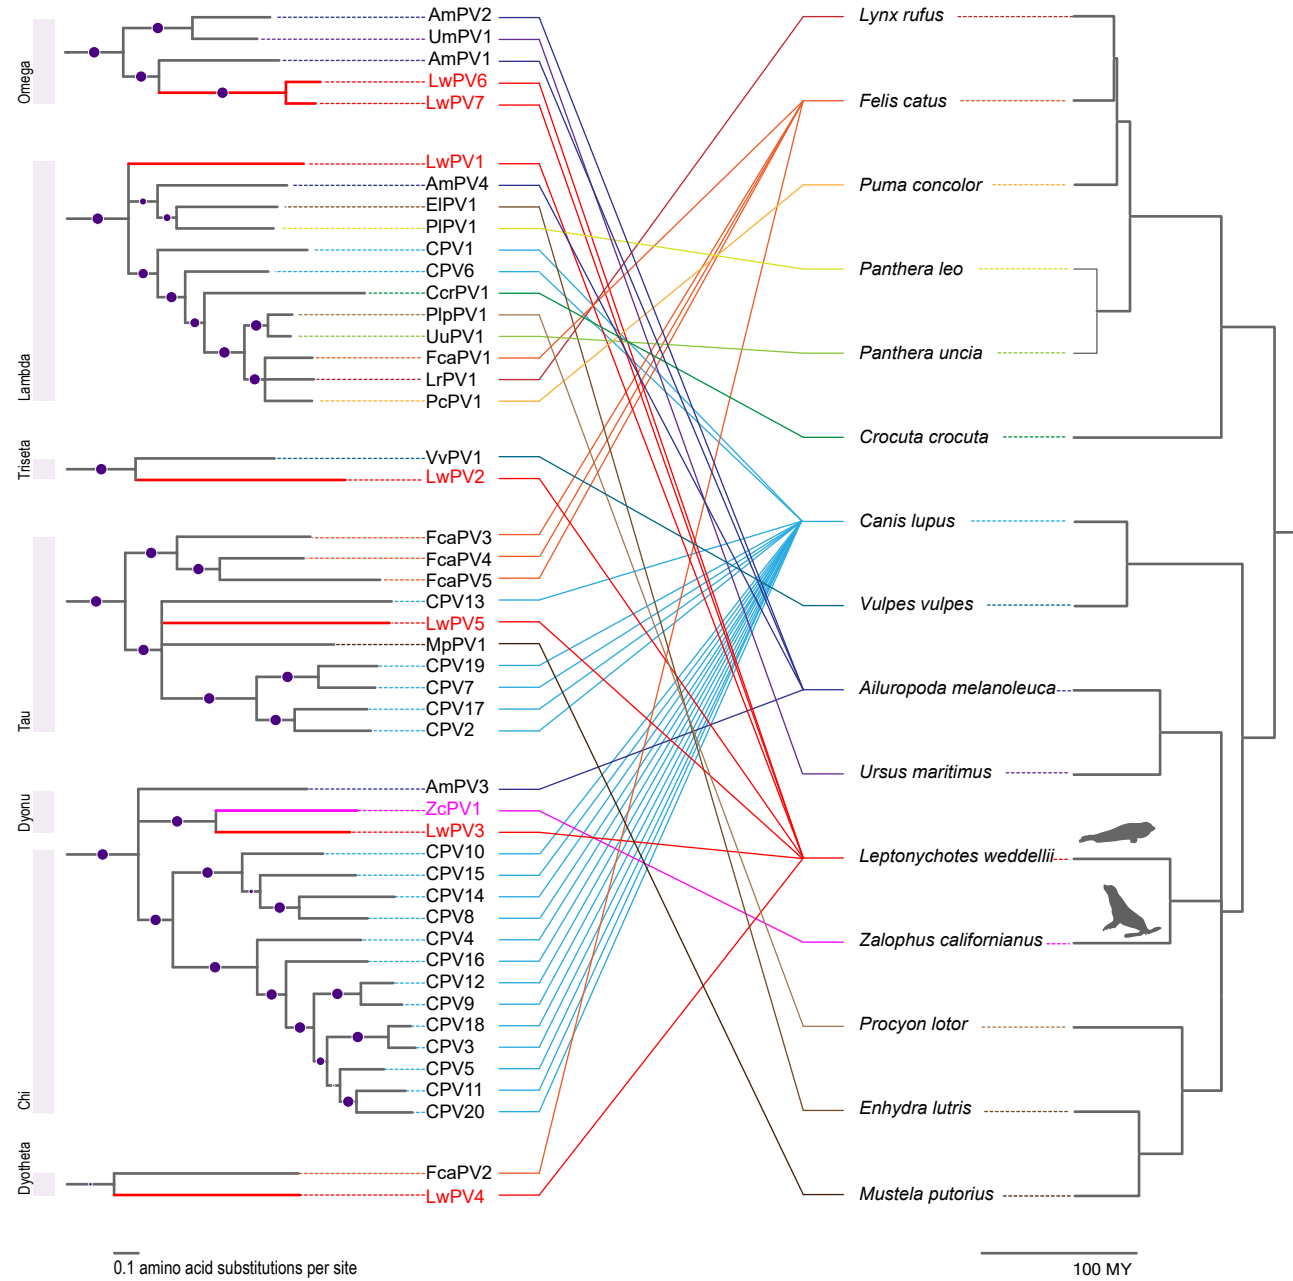

**Supplementary Figure 2:** Concatenated E1-E2-L1 tree (Figure 3) in left hand box. Shaded clades where LwPVs cluster are shown in full with phylogenetic relationship to papillomavirus members links drawn to respective hosts in carnivore phylogenetic tree.

**Supplementary Table 1:** All complete papillomavirus genomes including GenBank accession number, virus name, acronym, associated genus, species and host organism.

| GenBank Accession # | Virus                                   | Acronym | Genus                           | Species                          | Host                          |
|---------------------|-----------------------------------------|---------|---------------------------------|----------------------------------|-------------------------------|
| MF327535            | Ailuropoda melanoleuca papillomavirus 1 | AmPV1   | <i>Omegapapillomavirus</i>      | Unclassified                     | <i>Ailuropoda melanoleuca</i> |
| MF327536            | Ailuropoda melanoleuca papillomavirus 2 | AmPV2   | <i>Omegapapillomavirus</i>      | Unclassified                     | <i>Ailuropoda melanoleuca</i> |
| MF327537            | Ailuropoda Melanoleuca papillomavirus 3 | AmPV3   | <i>Dyonupapillomavirus</i>      | Unclassified                     | <i>Ailuropoda melanoleuca</i> |
| MF327538            | Ailuropoda melanoleuca papillomavirus 4 | AmPV4   | <i>Lamdapapillomavirus</i>      | Unclassified                     | <i>Ailuropoda melanoleuca</i> |
| M15953              | Alces alces papillomavirus 1            | AaPV1   | <i>Deltapapillomavirus</i>      | <i>Deltapapillomavirus 1</i>     | Alces Alces                   |
| KP861980            | Alouatta guariba papillomavirus 1       | AgPV1   | <i>Dyoomikronpapillomavirus</i> | <i>Dyoomikronpapillomavirus</i>  | <i>Alouatta guariba</i>       |
| HQ625440            | Apodemus sylvaticus papillomavirus 1    | AsPV1   | <i>Pipapillomavirus</i>         | <i>Pipapillomavirus 2</i>        | <i>Apodemus sylvaticus</i>    |
| GU220391            | Bettongia penicillata papillomavirus 1  | BpPV1   | <i>Dyolambdapapillomavirus</i>  | <i>Dyolambdapapillomavirus 1</i> | <i>Bettongia penicillata</i>  |
| JX174437            | Bos grunniens papillomavirus 1          | BgPV1   | <i>Deltapapillomavirus</i>      | <i>Deltapapillomavirus 4</i>     | <i>Bos grunniens</i>          |
| X02346              | Bos taurus papillomavirus 1             | BPV1    | <i>Deltapapillomavirus</i>      | <i>Deltapapillomavirus 4</i>     | <i>Bos Taurus</i>             |
| AB331651            | Bos taurus papillomavirus 10            | BPV10   | <i>Xipapillomavirus</i>         | <i>Xipapillomavirus 1</i>        | <i>Bos taurus</i>             |
| AB543507            | Bos taurus papillomavirus 11            | BPV11   | <i>Xipapillomavirus</i>         | <i>Xipapillomavirus 1</i>        | <i>Bos taurus</i>             |
| JF834523            | Bos taurus papillomavirus 12            | BPV12   | <i>Xipapillomavirus</i>         | <i>Xipapillomavirus 2</i>        | <i>Bos taurus</i>             |
| JQ798171            | Bos taurus papillomavirus 13            | BPV13   | <i>Deltapapillomavirus</i>      | <i>Deltapapillomavirus 4</i>     | <i>Bos taurus</i>             |
| M20219              | Bos taurus papillomavirus 2             | BPV2    | <i>Deltapapillomavirus</i>      | <i>Deltapapillomavirus 4</i>     | <i>Bos taurus</i>             |
| KY705374            | Bos taurus papillomavirus 22            | BPV22   | <i>Dyokappapapillomavirus</i>   | Unclassified                     | <i>Bos taurus</i>             |
| KX098515            | Bos taurus papillomavirus 23            | BPV23   | <i>Xipapillomavirus</i>         | Unclassified                     | <i>Bos taurus</i>             |
| AF486184            | Bos taurus papillomavirus 3             | BPV3    | <i>Xipapillomavirus</i>         | <i>Xipapillomavirus 1</i>        | <i>Bos taurus</i>             |
| X05817              | Bos taurus papillomavirus 4             | BPV4    | <i>Xipapillomavirus</i>         | <i>Xipapillomavirus 1</i>        | <i>Bos taurus</i>             |
| AF457465            | Bos taurus papillomavirus 5             | BPV5    | <i>Epsilonpapillomavirus</i>    | <i>Epsilonpapillomavirus 1</i>   | <i>Bos taurus</i>             |
| AJ620208            | Bos taurus papillomavirus 6             | BPV6    | <i>Xipapillomavirus</i>         | <i>Xipapillomavirus 1</i>        | <i>Bos taurus</i>             |
| DQ217793            | Bos taurus papillomavirus 6             | BPV7    | <i>Dyoxipapillomavirus</i>      | <i>Dyoxipapillomavirus 1</i>     | <i>Bos taurus</i>             |
| DQ098913            | Bos taurus papillomavirus 8             | BPV8    | <i>Epsilonpapillomavirus</i>    | <i>Epsilonpapillomavirus 1</i>   | <i>Bos taurus</i>             |
| AB331650            | Bos taurus papillomavirus 9             | BPV9    | <i>Xipapillomavirus</i>         | <i>Xipapillomavirus 1</i>        | <i>Bos taurus</i>             |
| KP276343            | Bovine papillomavirus 14                | BPV14   | <i>Deltapapillomavirus</i>      | <i>Deltapapillomavirus 4</i>     | <i>Bos taurus</i>             |
| KM983393            | Bovine papillomavirus 15                | BPV15   | <i>Xipapillomavirus</i>         | <i>Xipapillomavirus 1</i>        | <i>Bos taurus</i>             |
| KU519391            | Bovine papillomavirus 16                | BPV16   | <i>Dyokappapapillomavirus</i>   | <i>Dyokappapapillomavirus</i>    | <i>Bos taurus</i>             |
| KU519392            | Bovine papillomavirus 17                | BPV17   | <i>Xipapillomavirus</i>         | <i>Xipapillomavirus</i>          | <i>Bos taurus</i>             |
| KU519393            | Bovine papillomavirus 18                | BPV18   | <i>Dyokappapapillomavirus</i>   | <i>Dyokappapapillomavirus</i>    | <i>Bos taurus</i>             |
| KU519394            | Bovine papillomavirus 19                | BPV19   | Unclassified                    | Unclassified                     | <i>Bos taurus</i>             |
| KU519395            | Bovine papillomavirus 20                | BPV20   | <i>Xipapillomavirus</i>         | <i>Xipapillomavirus</i>          | <i>Bos taurus</i>             |
| KU519396            | Bovine papillomavirus 21                | BPV21   | Unclassified                    | Unclassified                     | <i>Bos taurus</i>             |
| HQ912790            | Camelus dromedarius papillomavirus 1    | CdPV1   | <i>Deltapapillomavirus</i>      | <i>Deltapapillomavirus 6</i>     | <i>Camelus dromedarius</i>    |
| HQ912791            | Camelus dromedarius papillomavirus 2    | CdPV2   | <i>Deltapapillomavirus</i>      | <i>Deltapapillomavirus 6</i>     | <i>Camelus dromedarius</i>    |
| KP099966            | Canine papillomavirus 16                | CPV16   | <i>Chipapillomavirus</i>        | <i>Chipapillomavirus 2</i>       | <i>Canis familiaris</i>       |
| KT272399            | Canine papillomavirus 17                | CPV17   | <i>Taupapillomavirus</i>        | <i>Taupapillomavirus</i>         | <i>Canis familiaris</i>       |
| KT326919            | Canine papillomavirus 18                | CPV18   | <i>Chipapillomavirus</i>        | <i>Chipapillomavirus</i>         | <i>Canis familiaris</i>       |
| KX599536            | Canine papillomavirus 19                | CPV19   | <i>Taupapillomavirus</i>        | <i>Taupapillomavirus</i>         | <i>Canis familiaris</i>       |
| KT901797            | Canine papillomavirus 20                | CPV20   | <i>Chipapillomavirus</i>        | <i>Chipapillomavirus</i>         | <i>Canis familiaris</i>       |
| D55633              | Canis familiaris oral papillomavirus 1  | CPV1    | <i>Lambdapapillomavirus</i>     | <i>Lambdapapillomavirus 2</i>    | <i>Canis familiaris</i>       |
| JF800657            | Canis familiaris papillomavirus 10      | CPV10   | <i>Chipapillomavirus</i>        | <i>Chipapillomavirus 3</i>       | <i>Canis familiaris</i>       |
| JF800658            | Canis familiaris papillomavirus 11      | CPV11   | <i>Chipapillomavirus</i>        | <i>Chipapillomavirus 1</i>       | <i>Canis familiaris</i>       |
| JQ754321            | Canis familiaris papillomavirus 12      | CPV12   | <i>Chipapillomavirus</i>        | <i>Chipapillomavirus 1</i>       | <i>Canis familiaris</i>       |

|          |                                          |         |                                 |                                   |                                |
|----------|------------------------------------------|---------|---------------------------------|-----------------------------------|--------------------------------|
| JX141478 | Canis familiaris papillomavirus 13       | CPV13   | <i>Taupapillomavirus</i>        | <i>Taupapillomavirus 2</i>        | <i>Canis familiaris</i>        |
| JQ701802 | Canis familiaris papillomavirus 14       | CPV14   | <i>Chipapillomavirus</i>        | <i>Chipapillomavirus 3</i>        | <i>Canis familiaris</i>        |
| JX899359 | Canis familiaris papillomavirus 15       | CPV15   | <i>Chipapillomavirus</i>        | <i>Chipapillomavirus 3</i>        | <i>Canis familiaris</i>        |
| AY722648 | Canis familiaris papillomavirus 2        | CPV2    | <i>Taupapillomavirus</i>        | <i>Taupapillomavirus 1</i>        | <i>Canis familiaris</i>        |
| DQ295066 | Canis familiaris papillomavirus 3        | CPV3    | <i>Chipapillomavirus</i>        | <i>Chipapillomavirus 1</i>        | <i>Canis familiaris</i>        |
| EF584537 | Canis familiaris papillomavirus 4        | CPV4    | <i>Chipapillomavirus</i>        | <i>Chipapillomavirus 2</i>        | <i>Canis familiaris</i>        |
| FJ492743 | Canis familiaris papillomavirus 5        | CPV5    | <i>Chipapillomavirus</i>        | <i>Chipapillomavirus 1</i>        | <i>Canis familiaris</i>        |
| FJ492744 | Canis familiaris papillomavirus 6        | CPV6    | <i>Lambdapapillomavirus</i>     | <i>Lambdapapillomavirus 3</i>     | <i>Canis familiaris</i>        |
| FJ492742 | Canis familiaris papillomavirus 7        | CPV7    | <i>Taupapillomavirus</i>        | <i>Taupapillomavirus 1</i>        | <i>Canis familiaris</i>        |
| HQ262536 | Canis familiaris papillomavirus 8        | CPV8    | <i>Chipapillomavirus</i>        | <i>Chipapillomavirus 3</i>        | <i>Canis familiaris</i>        |
| JF800656 | Canis familiaris papillomavirus 9        | CPV9    | <i>Chipapillomavirus</i>        | <i>Chipapillomavirus 1</i>        | <i>Canis familiaris</i>        |
| DQ091200 | Capra hircus papillomavirus 1            | ChPV1   | <i>Phipapillomavirus</i>        | <i>Phipapillomavirus 1</i>        | <i>Capra hircus</i>            |
| EF680235 | Capreolus capreolus papillomavirus 1     | CcaPV1  | <i>Deltapapillomavirus</i>      | <i>Deltapapillomavirus 5</i>      | <i>Capreolus capreolus</i>     |
| EU493092 | Caretta caretta papillomavirus 1         | CcPV1   | <i>Dyozetapapillomavirus</i>    | <i>Dyozetapapillomavirus 1</i>    | <i>Caretta caretta</i>         |
| KC020689 | Castor canadensis papillomavirus 1       | CcanPV1 | <i>Dyosigmapapillomavirus</i>   | <i>Dyosigmapapillomavirus 1</i>   | <i>Castor canadensis</i>       |
| KT932712 | Cervus elaphus papillomavirus 1          | CePV2   | <i>Xipapillomavirus</i>         | <i>Xipapillomavirus</i>           | <i>Cervus elaphus</i>          |
| KU350625 | Cervus elaphus papillomavirus 2          | CePV1   | <i>Epsilonpapillomavirus</i>    | <i>Epsilonpapillomavirus</i>      | <i>Cervus elaphus</i>          |
| EU493091 | Chelonia mydas papillomavirus 1          | CmPV1   | <i>Dyozetapapillomavirus</i>    | <i>Dyozetapapillomavirus 1</i>    | <i>Chelonia mydas</i>          |
| GU014532 | Colobus guereza papillomavirus 1         | CgPV1   | <i>Alphapapillomavirus</i>      | <i>Alphapapillomavirus 14</i>     | <i>Colobus guereza</i>         |
| GU014533 | Colobus guereza papillomavirus 2         | CgPV2   | <i>Betapapillomavirus</i>       | <i>Betapapillomavirus 1</i>       | <i>Colobus guereza</i>         |
| HQ585856 | Crocota crocuta papillomavirus 1         | CcrPV1  | <i>Lambdapapillomavirus</i>     | <i>Lambdapapillomavirus 5</i>     | <i>Crocota crocuta</i>         |
| GU117620 | Delphinus delphis papillomavirus         | DdPV1   | <i>Upsilonpapillomavirus</i>    | <i>Upsilonpapillomavirus 1</i>    | <i>Delphinus delphis</i>       |
| JX123128 | Eidolon helvum papillomavirus 1          | EhPV1   | <i>Dyopsilonpapillomavirus</i>  | <i>Dyopsilonpapillomavirus 1</i>  | <i>Eidolon helvum</i>          |
| KX276957 | Eidolon helvum papillomavirus 2          | EhPV2   | <i>Psipapillomavirus</i>        | Unclassified                      | <i>Eidolon helvum</i>          |
| KX276956 | Eidolon helvum papillomavirus 3          | EhPV3   | <i>Psipapillomavirus</i>        | Unclassified                      | <i>Eidolon helvum</i>          |
| KJ410351 | Enhydra lutris papillomavirus 1          | EIPV1   | <i>Lambdapapillomavirus</i>     | <i>Lambdapapillomavirus 4</i>     | <i>Enhydra lutris</i>          |
| KC858263 | Eptesicus serotinus papillomavirus 1     | EsPV1   | <i>Dyopsipapillomavirus</i>     | <i>Dyopsipapillomavirus 1</i>     | <i>Eptesicus serotinus</i>     |
| KC858264 | Eptesicus serotinus papillomavirus 2     | EsPV2   | <i>Dyoomegapapillomavirus</i>   | <i>Dyoomegapapillomavirus 1</i>   | <i>Eptesicus serotinus</i>     |
| KC858265 | Eptesicus serotinus papillomavirus 3     | EsPV3   | <i>Dyopsipapillomavirus</i>     | <i>Dyopsipapillomavirus 1</i>     | <i>Eptesicus serotinus</i>     |
| KF741371 | Equus asinus papillomavirus              | EaPV1   | <i>Dyochipapillomavirus</i>     | <i>Dyochipapillomavirus 1</i>     | <i>Equus Asinus</i>            |
| AF498323 | Equus caballus papillomavirus 1          | EcPV1   | <i>Zetapapillomavirus</i>       | <i>Zetapapillomavirus 1</i>       | <i>Equus ferus caballus</i>    |
| EU503122 | Equus caballus papillomavirus 2          | EcPV2   | <i>Dyoiotapapillomavirus</i>    | <i>Dyoiotapapillomavirus 1</i>    | <i>Equus ferus caballus</i>    |
| GU384895 | Equus caballus papillomavirus 3          | EcPV3   | <i>Dyorchopapillomavirus</i>    | <i>Dyorchopapillomavirus 1</i>    | <i>Equus ferus caballus</i>    |
| JQ031032 | Equus caballus papillomavirus 4          | EcPV4   | <i>Dyoiotapapillomavirus</i>    | <i>Dyoiotapapillomavirus 2</i>    | <i>Equus ferus caballus</i>    |
| JQ031033 | Equus caballus papillomavirus 5          | EcPV5   | <i>Dyoiotapapillomavirus</i>    | <i>Dyoiotapapillomavirus 2</i>    | <i>Equus ferus caballus</i>    |
| JQ965698 | Equus caballus papillomavirus 6          | EcPV6   | <i>Dyorchopapillomavirus</i>    | <i>Dyorchopapillomavirus 1</i>    | <i>Equus ferus caballus</i>    |
| JX035935 | Equus caballus papillomavirus 7          | EcPV7   | <i>Dyorchopapillomavirus</i>    | <i>Dyorchopapillomavirus 1</i>    | <i>Equus ferus caballus</i>    |
| KU963288 | Equus caballus papillomavirus 8          | EcPV8   | Unclassified                    | Unclassified                      | <i>Equus ferus caballus</i>    |
| AY684126 | Erethizon dorsatum papillomavirus 1      | EdPV1   | <i>Sigmapapillomavirus</i>      | <i>Sigmapapillomavirus 1</i>      | <i>Erethizon dorsatum</i>      |
| FJ379293 | Erinaceus europaeus papillomavirus 1     | EePV1   | <i>Dyoetapapillomavirus</i>     | <i>Dyoetapapillomavirus 1</i>     | <i>Erinaceus europaeus</i>     |
| JX972168 | Felis catus papillomavirus 3             | FcaPV3  | <i>Taupapillomavirus</i>        | <i>Taupapillomavirus 3</i>        | <i>Felis domesticus</i>        |
| KF147892 | Felis catus papillomavirus 4             | FcaPV4  | <i>Taupapillomavirus</i>        | <i>Taupapillomavirus 3</i>        | <i>Felis domesticus</i>        |
| KY853656 | Felis catus papillomavirus 5             | FcaPV5  | <i>Taupapillomavirus</i>        | Unclassified                      | <i>Felis domesticus</i>        |
| AF480454 | Felis domesticus papillomavirus 1        | FcaPV1  | <i>Lambdapapillomavirus</i>     | <i>Lambdapapillomavirus 1</i>     | <i>Felis domesticus</i>        |
| EU796884 | Felis domesticus papillomavirus 2        | FcaPV2  | <i>Dyothetapapillomavirus</i>   | <i>Dyothetapapillomavirus 1</i>   | <i>Felis domesticus</i>        |
| EU188799 | Francolinus leucoscepus papillomavirus 1 | FIPV1   | <i>Dyoepsilonpapillomavirus</i> | <i>Dyoepsilonpapillomavirus 1</i> | <i>Francolinus leucoscepus</i> |
| AY057109 | Fringilla coelebs papillomavirus         | FcPV1   | <i>Etapapillomavirus</i>        | <i>Etapapillomavirus 1</i>        | <i>Fringilla coelebs</i>       |
| KJ452243 | Fulmarus glacialis papillomavirus 1      | FgPV1   | <i>Treiszetapapillomavirus</i>  | <i>Treiszetapapillomavirus</i>    | <i>Fulmarus Glacialis</i>      |
| KX954132 | Giraffa camelopardalis papillomavirus 1  | GcPV1   | <i>Deltapapillomavirus</i>      | <i>Deltapapillomavirus</i>        | <i>Giraffa camelopardalis</i>  |
| V01116   | Human papillomavirus 1                   | HPV1    | <i>Mupapillomavirus</i>         | <i>Mupapillomavirus 1</i>         | <i>Homo sapiens</i>            |

|          |                          |        |                     |                        |              |
|----------|--------------------------|--------|---------------------|------------------------|--------------|
| X74465   | Human papillomavirus 10  | HPV10  | Alphapapillomavirus | Alphapapillomavirus 2  | Homo sapiens |
| FM955839 | Human papillomavirus 100 | HPV100 | Betapapillomavirus  | Betapapillomavirus 2   | Homo sapiens |
| DQ080081 | Human papillomavirus 101 | HPV101 | Gammapapillomavirus | Gammapapillomavirus 6  | Homo sapiens |
| DQ080083 | Human papillomavirus 102 | HPV102 | Alphapapillomavirus | Alphapapillomavirus 3  | Homo sapiens |
| DQ080078 | Human papillomavirus 103 | HPV103 | Gammapapillomavirus | Gammapapillomavirus 6  | Homo sapiens |
| FM955840 | Human papillomavirus 104 | HPV104 | Betapapillomavirus  | Betapapillomavirus 2   | Homo sapiens |
| FM955841 | Human papillomavirus 105 | HPV105 | Betapapillomavirus  | Betapapillomavirus 1   | Homo sapiens |
| DQ080082 | Human papillomavirus 106 | HPV106 | Alphapapillomavirus | Alphapapillomavirus 14 | Homo sapiens |
| EF422221 | Human papillomavirus 107 | HPV107 | Betapapillomavirus  | Betapapillomavirus 2   | Homo sapiens |
| FM212639 | Human papillomavirus 108 | HPV108 | Gammapapillomavirus | Gammapapillomavirus 6  | Homo sapiens |
| EU541441 | Human papillomavirus 109 | HPV109 | Gammapapillomavirus | Gammapapillomavirus 7  | Homo sapiens |
| M14119   | Human papillomavirus 11  | HPV11  | Alphapapillomavirus | Alphapapillomavirus 10 | Homo sapiens |
| EU410348 | Human papillomavirus 110 | HPV110 | Betapapillomavirus  | Betapapillomavirus 2   | Homo sapiens |
| EU410349 | Human papillomavirus 111 | HPV111 | Betapapillomavirus  | Betapapillomavirus 2   | Homo sapiens |
| EU541442 | Human papillomavirus 112 | HPV112 | Gammapapillomavirus | Gammapapillomavirus 8  | Homo sapiens |
| FM955842 | Human papillomavirus 113 | HPV113 | Betapapillomavirus  | Betapapillomavirus 2   | Homo sapiens |
| GQ244463 | Human papillomavirus 114 | HPV114 | Alphapapillomavirus | Alphapapillomavirus 3  | Homo sapiens |
| FJ947080 | Human papillomavirus 115 | HPV115 | Betapapillomavirus  | Betapapillomavirus 3   | Homo sapiens |
| FJ804072 | Human papillomavirus 116 | HPV116 | Gammapapillomavirus | Gammapapillomavirus 9  | Homo sapiens |
| GQ246950 | Human papillomavirus 117 | HPV117 | Alphapapillomavirus | Alphapapillomavirus 2  | Homo sapiens |
| GQ246951 | Human papillomavirus 118 | HPV118 | Betapapillomavirus  | Betapapillomavirus 1   | Homo sapiens |
| GQ845441 | Human papillomavirus 119 | HPV119 | Gammapapillomavirus | Gammapapillomavirus 8  | Homo sapiens |
| X74466   | Human papillomavirus 12  | HPV12  | Betapapillomavirus  | Betapapillomavirus 1   | Homo sapiens |
| GQ845442 | Human papillomavirus 120 | HPV120 | Betapapillomavirus  | Betapapillomavirus 2   | Homo sapiens |
| GQ845443 | Human papillomavirus 121 | HPV121 | Gammapapillomavirus | Gammapapillomavirus 10 | Homo sapiens |
| GQ845444 | Human papillomavirus 122 | HPV122 | Betapapillomavirus  | Betapapillomavirus 2   | Homo sapiens |
| GQ845445 | Human papillomavirus 123 | HPV123 | Gammapapillomavirus | Gammapapillomavirus 7  | Homo sapiens |
| GQ845446 | Human papillomavirus 124 | HPV124 | Betapapillomavirus  | Betapapillomavirus 1   | Homo sapiens |
| FN547152 | Human papillomavirus 125 | HPV125 | Alphapapillomavirus | Alphapapillomavirus 2  | Homo sapiens |
| AB646346 | Human papillomavirus 126 | HPV126 | Gammapapillomavirus | Gammapapillomavirus 11 | Homo sapiens |
| HM011570 | Human papillomavirus 127 | HPV127 | Gammapapillomavirus | Gammapapillomavirus 12 | Homo sapiens |
| GU225708 | Human papillomavirus 128 | HPV128 | Gammapapillomavirus | Gammapapillomavirus 13 | Homo sapiens |
| GU233853 | Human papillomavirus 129 | HPV129 | Gammapapillomavirus | Gammapapillomavirus 9  | Homo sapiens |
| X62843   | Human papillomavirus 13  | HPV13  | Alphapapillomavirus | Alphapapillomavirus 10 | Homo sapiens |
| GU117630 | Human papillomavirus 130 | HPV130 | Gammapapillomavirus | Gammapapillomavirus 10 | Homo sapiens |
| GU117631 | Human papillomavirus 131 | HPV131 | Gammapapillomavirus | Gammapapillomavirus 14 | Homo sapiens |
| GU117632 | Human papillomavirus 132 | HPV132 | Gammapapillomavirus | Gammapapillomavirus 12 | Homo sapiens |
| GU117633 | Human papillomavirus 133 | HPV133 | Gammapapillomavirus | Gammapapillomavirus 10 | Homo sapiens |
| GU117634 | Human papillomavirus 134 | HPV134 | Gammapapillomavirus | Gammapapillomavirus 7  | Homo sapiens |
| HM999987 | Human papillomavirus 135 | HPV135 | Gammapapillomavirus | Gammapapillomavirus 15 | Homo sapiens |
| HM999988 | Human papillomavirus 136 | HPV136 | Gammapapillomavirus | Gammapapillomavirus 11 | Homo sapiens |
| HM999989 | Human papillomavirus 137 | HPV137 | Gammapapillomavirus | Gammapapillomavirus 16 | Homo sapiens |
| HM999990 | Human papillomavirus 138 | HPV138 | Gammapapillomavirus | Gammapapillomavirus 7  | Homo sapiens |
| HM999991 | Human papillomavirus 139 | HPV139 | Gammapapillomavirus | Gammapapillomavirus 7  | Homo sapiens |
| X74467   | Human papillomavirus 14  | HPV14  | Betapapillomavirus  | Betapapillomavirus 1   | Homo sapiens |
| HM999992 | Human papillomavirus 140 | HPV140 | Gammapapillomavirus | Gammapapillomavirus 11 | Homo sapiens |
| HM999993 | Human papillomavirus 141 | HPV141 | Gammapapillomavirus | Gammapapillomavirus 11 | Homo sapiens |
| HM999994 | Human papillomavirus 142 | HPV142 | Gammapapillomavirus | Gammapapillomavirus 10 | Homo sapiens |
| HM999995 | Human papillomavirus 143 | HPV143 | Betapapillomavirus  | Betapapillomavirus 1   | Homo sapiens |
| HM999996 | Human papillomavirus 144 | HPV144 | Gammapapillomavirus | Gammapapillomavirus 17 | Homo sapiens |

|          |                          |        |                     |                        |              |
|----------|--------------------------|--------|---------------------|------------------------|--------------|
| HM999997 | Human papillomavirus 145 | HPV145 | Betapapillomavirus  | Betapapillomavirus 2   | Homo sapiens |
| HM999998 | Human papillomavirus 146 | HPV146 | Gammapapillomavirus | Gammapapillomavirus 15 | Homo sapiens |
| HM999999 | Human papillomavirus 147 | HPV147 | Gammapapillomavirus | Gammapapillomavirus 8  | Homo sapiens |
| GU129016 | Human papillomavirus 148 | HPV148 | Gammapapillomavirus | Gammapapillomavirus 12 | Homo sapiens |
| GU117629 | Human papillomavirus 149 | HPV149 | Gammapapillomavirus | Gammapapillomavirus 7  | Homo sapiens |
| X74468   | Human papillomavirus 15  | HPV15  | Betapapillomavirus  | Betapapillomavirus 2   | Homo sapiens |
| FN677755 | Human papillomavirus 150 | HPV150 | Betapapillomavirus  | Betapapillomavirus 5   | Homo sapiens |
| FN677756 | Human papillomavirus 151 | HPV151 | Betapapillomavirus  | Betapapillomavirus 2   | Homo sapiens |
| JF304768 | Human papillomavirus 152 | HPV152 | Betapapillomavirus  | Betapapillomavirus 1   | Homo sapiens |
| JN171845 | Human papillomavirus 153 | HPV153 | Gammapapillomavirus | Gammapapillomavirus 13 | Homo sapiens |
| JN211193 | Human papillomavirus 154 | HPV154 | Gammapapillomavirus | Gammapapillomavirus 11 | Homo sapiens |
| JF906559 | Human papillomavirus 155 | HPV155 | Gammapapillomavirus | Gammapapillomavirus 7  | Homo sapiens |
| JX429973 | Human papillomavirus 156 | HPV156 | Gammapapillomavirus | Gammapapillomavirus 18 | Homo sapiens |
| KT698166 | Human papillomavirus 157 | HPV157 | Gammapapillomavirus | Gammapapillomavirus    | Homo sapiens |
| KT698168 | Human papillomavirus 158 | HPV158 | Gammapapillomavirus | Gammapapillomavirus    | Homo sapiens |
| HE963025 | Human papillomavirus 159 | HPV159 | Betapapillomavirus  | Betapapillomavirus 2   | Homo sapiens |
| K02718   | Human papillomavirus 16  | HPV16  | Alphapapillomavirus | Alphapapillomavirus 9  | Homo sapiens |
| AB745694 | Human papillomavirus 160 | HPV160 | Alphapapillomavirus | Alphapapillomavirus 2  | Homo sapiens |
| JX413109 | Human papillomavirus 161 | HPV161 | Gammapapillomavirus | Gammapapillomavirus 19 | Homo sapiens |
| JX413108 | Human papillomavirus 162 | HPV162 | Gammapapillomavirus | Gammapapillomavirus 19 | Homo sapiens |
| JX413107 | Human papillomavirus 163 | HPV163 | Gammapapillomavirus | Gammapapillomavirus 20 | Homo sapiens |
| JX413106 | Human papillomavirus 164 | HPV164 | Gammapapillomavirus | Gammapapillomavirus 8  | Homo sapiens |
| JX444072 | Human papillomavirus 165 | HPV165 | Gammapapillomavirus | Gammapapillomavirus 12 | Homo sapiens |
| JX413104 | Human papillomavirus 166 | HPV166 | Gammapapillomavirus | Gammapapillomavirus 19 | Homo sapiens |
| KC862318 | Human papillomavirus 167 | HPV167 | Gammapapillomavirus | Gammapapillomavirus 21 | Homo sapiens |
| KC862317 | Human papillomavirus 168 | HPV168 | Gammapapillomavirus | Gammapapillomavirus 8  | Homo sapiens |
| JX413105 | Human papillomavirus 169 | HPV169 | Gammapapillomavirus | Gammapapillomavirus 11 | Homo sapiens |
| X74469   | Human papillomavirus 17  | HPV17  | Betapapillomavirus  | Betapapillomavirus 2   | Homo sapiens |
| JX413110 | Human papillomavirus 170 | HPV170 | Gammapapillomavirus | Gammapapillomavirus 7  | Homo sapiens |
| KF006398 | Human papillomavirus 171 | HPV171 | Gammapapillomavirus | Gammapapillomavirus 11 | Homo sapiens |
| KF006399 | Human papillomavirus 172 | HPV172 | Gammapapillomavirus | Gammapapillomavirus 22 | Homo sapiens |
| KF006400 | Human papillomavirus 173 | HPV173 | Gammapapillomavirus | Gammapapillomavirus 1  | Homo sapiens |
| HF930491 | Human papillomavirus 174 | HPV174 | Betapapillomavirus  | Betapapillomavirus 2   | Homo sapiens |
| KC108721 | Human papillomavirus 175 | HPV175 | Gammapapillomavirus | Gammapapillomavirus 23 | Homo sapiens |
| KJ130020 | Human papillomavirus 178 | HPV178 | Gammapapillomavirus | Gammapapillomavirus 24 | Homo sapiens |
| X05015   | Human papillomavirus 18  | HPV18  | Alphapapillomavirus | Alphapapillomavirus 7  | Homo sapiens |
| KC108722 | Human papillomavirus 180 | HPV180 | Gammapapillomavirus | Gammapapillomavirus 10 | Homo sapiens |
| X74470   | Human papillomavirus 19  | HPV19  | Betapapillomavirus  | Betapapillomavirus 1   | Homo sapiens |
| X55964   | Human papillomavirus 2   | HPV2   | Alphapapillomavirus | Alphapapillomavirus 4  | Homo sapiens |
| U31778   | Human papillomavirus 20  | HPV20  | Betapapillomavirus  | Betapapillomavirus 1   | Homo sapiens |
| KP692114 | Human papillomavirus 200 | HPV200 | Gammapapillomavirus | Gammapapillomavirus 2  | Homo sapiens |
| KP692115 | Human papillomavirus 201 | HPV201 | Gammapapillomavirus | Gammapapillomavirus 27 | Homo sapiens |
| KP692116 | Human papillomavirus 202 | HPV202 | Gammapapillomavirus | Gammapapillomavirus 11 | Homo sapiens |
| KP769769 | Human papillomavirus 204 | HPV204 | Mupapillomavirus    | Mupapillomavirus 3     | Homo sapiens |
| KT698167 | Human papillomavirus 205 | HPV205 | Gammapapillomavirus | Gammapapillomavirus 1  | Homo sapiens |
| KY242583 | Human papillomavirus 209 | HPV209 | Betapapillomavirus  | Unclassified           | Homo sapiens |
| U31779   | Human papillomavirus 21  | HPV21  | Betapapillomavirus  | Betapapillomavirus 1   | Homo sapiens |
| U31780   | Human papillomavirus 22  | HPV22  | Betapapillomavirus  | Betapapillomavirus 2   | Homo sapiens |
| U31781   | Human papillomavirus 23  | HPV23  | Betapapillomavirus  | Betapapillomavirus 2   | Homo sapiens |
| U31782   | Human papillomavirus 24  | HPV24  | Betapapillomavirus  | Betapapillomavirus 1   | Homo sapiens |

|          |                         |       |                     |                        |              |
|----------|-------------------------|-------|---------------------|------------------------|--------------|
| X74471   | Human papillomavirus 25 | HPV25 | Betapapillomavirus  | Betapapillomavirus 1   | Homo sapiens |
| X74472   | Human papillomavirus 26 | HPV26 | Alphapapillomavirus | Alphapapillomavirus 5  | Homo sapiens |
| X74473   | Human papillomavirus 27 | HPV27 | Alphapapillomavirus | Alphapapillomavirus 4  | Homo sapiens |
| U31783   | Human papillomavirus 28 | HPV28 | Alphapapillomavirus | Alphapapillomavirus 2  | Homo sapiens |
| U31784   | Human papillomavirus 29 | HPV29 | Alphapapillomavirus | Alphapapillomavirus 2  | Homo sapiens |
| X74462   | Human papillomavirus 3  | HPV3  | Alphapapillomavirus | Alphapapillomavirus 2  | Homo sapiens |
| X74474   | Human papillomavirus 30 | HPV30 | Alphapapillomavirus | Alphapapillomavirus 6  | Homo sapiens |
| J04353   | Human papillomavirus 31 | HPV31 | Alphapapillomavirus | Alphapapillomavirus 9  | Homo sapiens |
| X74475   | Human papillomavirus 32 | HPV32 | Alphapapillomavirus | Alphapapillomavirus 1  | Homo sapiens |
| M12732   | Human papillomavirus 33 | HPV33 | Alphapapillomavirus | Alphapapillomavirus 9  | Homo sapiens |
| X74476   | Human papillomavirus 34 | HPV34 | Alphapapillomavirus | Alphapapillomavirus 11 | Homo sapiens |
| X74477   | Human papillomavirus 35 | HPV35 | Alphapapillomavirus | Alphapapillomavirus 9  | Homo sapiens |
| U31785   | Human papillomavirus 36 | HPV36 | Betapapillomavirus  | Betapapillomavirus 1   | Homo sapiens |
| U31786   | Human papillomavirus 37 | HPV37 | Betapapillomavirus  | Betapapillomavirus 2   | Homo sapiens |
| U31787   | Human papillomavirus 38 | HPV38 | Betapapillomavirus  | Betapapillomavirus 2   | Homo sapiens |
| M62849   | Human papillomavirus 39 | HPV39 | Alphapapillomavirus | Alphapapillomavirus 7  | Homo sapiens |
| X70827   | Human papillomavirus 4  | HPV4  | Gammapapillomavirus | Gammapapillomavirus 1  | Homo sapiens |
| X74478   | Human papillomavirus 40 | HPV40 | Alphapapillomavirus | Alphapapillomavirus 8  | Homo sapiens |
| X56147   | Human papillomavirus 41 | HPV41 | Nupapillomavirus    | Nupapillomavirus 1     | Homo sapiens |
| M73236   | Human papillomavirus 42 | HPV42 | Alphapapillomavirus | Alphapapillomavirus 1  | Homo sapiens |
| AJ620205 | Human papillomavirus 43 | HPV43 | Alphapapillomavirus | Alphapapillomavirus 8  | Homo sapiens |
| U31788   | Human papillomavirus 44 | HPV44 | Alphapapillomavirus | Alphapapillomavirus 10 | Homo sapiens |
| X74479   | Human papillomavirus 45 | HPV45 | Alphapapillomavirus | Alphapapillomavirus 7  | Homo sapiens |
| M32305   | Human papillomavirus 47 | HPV47 | Betapapillomavirus  | Betapapillomavirus 1   | Homo sapiens |
| U31789   | Human papillomavirus 48 | HPV48 | Gammapapillomavirus | Gammapapillomavirus 2  | Homo sapiens |
| X74480   | Human papillomavirus 49 | HPV49 | Betapapillomavirus  | Betapapillomavirus 3   | Homo sapiens |
| M17463   | Human papillomavirus 5  | HPV5  | Betapapillomavirus  | Betapapillomavirus 1   | Homo sapiens |
| U31790   | Human papillomavirus 50 | HPV50 | Gammapapillomavirus | Gammapapillomavirus 3  | Homo sapiens |
| M62877   | Human papillomavirus 51 | HPV51 | Alphapapillomavirus | Alphapapillomavirus 5  | Homo sapiens |
| X74481   | Human papillomavirus 52 | HPV52 | Alphapapillomavirus | Alphapapillomavirus 9  | Homo sapiens |
| X74482   | Human papillomavirus 53 | HPV53 | Alphapapillomavirus | Alphapapillomavirus 6  | Homo sapiens |
| U37488   | Human papillomavirus 54 | HPV54 | Alphapapillomavirus | Alphapapillomavirus 13 | Homo sapiens |
| X74483   | Human papillomavirus 56 | HPV56 | Alphapapillomavirus | Alphapapillomavirus 6  | Homo sapiens |
| X55965   | Human papillomavirus 57 | HPV57 | Alphapapillomavirus | Alphapapillomavirus 4  | Homo sapiens |
| D90400   | Human papillomavirus 58 | HPV58 | Alphapapillomavirus | Alphapapillomavirus 9  | Homo sapiens |
| X77858   | Human papillomavirus 59 | HPV59 | Alphapapillomavirus | Alphapapillomavirus 7  | Homo sapiens |
| X00203   | Human papillomavirus 6  | HPV6  | Alphapapillomavirus | Alphapapillomavirus 10 | Homo sapiens |
| U31792   | Human papillomavirus 60 | HPV60 | Gammapapillomavirus | Gammapapillomavirus 4  | Homo sapiens |
| U31793   | Human papillomavirus 61 | HPV61 | Alphapapillomavirus | Alphapapillomavirus 3  | Homo sapiens |
| AY395706 | Human papillomavirus 62 | HPV62 | Alphapapillomavirus | Alphapapillomavirus 3  | Homo sapiens |
| X70828   | Human papillomavirus 63 | HPV63 | Mupapillomavirus    | Mupapillomavirus 2     | Homo sapiens |
| X70829   | Human papillomavirus 65 | HPV65 | Gammapapillomavirus | Gammapapillomavirus 1  | Homo sapiens |
| U31794   | Human papillomavirus 66 | HPV66 | Alphapapillomavirus | Alphapapillomavirus 6  | Homo sapiens |
| D21208   | Human papillomavirus 67 | HPV67 | Alphapapillomavirus | Alphapapillomavirus 9  | Homo sapiens |
| DQ080079 | Human papillomavirus 68 | HPV68 | Alphapapillomavirus | Alphapapillomavirus 7  | Homo sapiens |
| AB027020 | Human papillomavirus 69 | HPV69 | Alphapapillomavirus | Alphapapillomavirus 5  | Homo sapiens |
| X74463   | Human papillomavirus 7  | HPV7  | Alphapapillomavirus | Alphapapillomavirus 8  | Homo sapiens |
| U21941   | Human papillomavirus 70 | HPV70 | Alphapapillomavirus | Alphapapillomavirus 7  | Homo sapiens |
| AB040456 | Human papillomavirus 71 | HPV71 | Alphapapillomavirus | Alphapapillomavirus 14 | Homo sapiens |
| X94164   | Human papillomavirus 72 | HPV72 | Alphapapillomavirus | Alphapapillomavirus 3  | Homo sapiens |

|          |                                          |        |                      |                        |                         |
|----------|------------------------------------------|--------|----------------------|------------------------|-------------------------|
| X94165   | Human papillomavirus 73                  | HPV73  | Alphapapillomavirus  | Alphapapillomavirus 11 | Homo sapiens            |
| AF436130 | Human papillomavirus 74                  | HPV74  | Alphapapillomavirus  | Alphapapillomavirus 10 | Homo sapiens            |
| Y15173   | Human papillomavirus 75                  | HPV75  | Betapapillomavirus   | Betapapillomavirus 3   | Homo sapiens            |
| Y15174   | Human papillomavirus 76                  | HPV76  | Betapapillomavirus   | Betapapillomavirus 3   | Homo sapiens            |
| Y15175   | Human papillomavirus 77                  | HPV77  | Alphapapillomavirus  | Alphapapillomavirus 2  | Homo sapiens            |
| KC138720 | Human papillomavirus 78                  | HPV78  | Alphapapillomavirus  | Alphapapillomavirus 2  | Homo sapiens            |
| M12737   | Human papillomavirus 8                   | HPV8   | Betapapillomavirus   | Betapapillomavirus 1   | Homo sapiens            |
| Y15176   | Human papillomavirus 80                  | HPV80  | Betapapillomavirus   | Betapapillomavirus 2   | Homo sapiens            |
| AJ620209 | Human papillomavirus 81                  | HPV81  | Alphapapillomavirus  | Alphapapillomavirus 3  | Homo sapiens            |
| AB027021 | Human papillomavirus 82                  | HPV82  | Alphapapillomavirus  | Alphapapillomavirus 5  | Homo sapiens            |
| AF151983 | Human papillomavirus 83                  | HPV83  | Alphapapillomavirus  | Alphapapillomavirus 3  | Homo sapiens            |
| AF293960 | Human papillomavirus 84                  | HPV84  | Alphapapillomavirus  | Alphapapillomavirus 3  | Homo sapiens            |
| AF131950 | Human papillomavirus 85                  | HPV85  | Alphapapillomavirus  | Alphapapillomavirus 7  | Homo sapiens            |
| AF349909 | Human papillomavirus 86                  | HPV86  | Alphapapillomavirus  | Alphapapillomavirus 3  | Homo sapiens            |
| AJ400628 | Human papillomavirus 87                  | HPV87  | Alphapapillomavirus  | Alphapapillomavirus 3  | Homo sapiens            |
| EF467176 | Human papillomavirus 88                  | HPV88  | Gammapapillomavirus  | Gammapapillomavirus 5  | Homo sapiens            |
| AF436128 | Human papillomavirus 89                  | HPV89  | Alphapapillomavirus  | Alphapapillomavirus 3  | Homo sapiens            |
| X74464   | Human papillomavirus 9                   | HPV9   | Betapapillomavirus   | Betapapillomavirus 2   | Homo sapiens            |
| AY057438 | Human papillomavirus 90                  | HPV90  | Alphapapillomavirus  | Alphapapillomavirus 14 | Homo sapiens            |
| AF419318 | Human papillomavirus 91                  | HPV91  | Alphapapillomavirus  | Alphapapillomavirus 8  | Homo sapiens            |
| AF531420 | Human papillomavirus 92                  | HPV92  | Betapapillomavirus   | Betapapillomavirus 4   | Homo sapiens            |
| AY382778 | Human papillomavirus 93                  | HPV93  | Betapapillomavirus   | Betapapillomavirus 1   | Homo sapiens            |
| AJ620211 | Human papillomavirus 94                  | HPV94  | Alphapapillomavirus  | Alphapapillomavirus 2  | Homo sapiens            |
| AJ620210 | Human papillomavirus 95                  | HPV95  | Gammapapillomavirus  | Gammapapillomavirus 1  | Homo sapiens            |
| AY382779 | Human papillomavirus 96                  | HPV96  | Betapapillomavirus   | Betapapillomavirus 5   | Homo sapiens            |
| DQ080080 | Human papillomavirus 97                  | HPV97  | Alphapapillomavirus  | Alphapapillomavirus 7  | Homo sapiens            |
| FM955837 | Human papillomavirus 98                  | HPV98  | Betapapillomavirus   | Betapapillomavirus 1   | Homo sapiens            |
| FM955838 | Human papillomavirus 99                  | HPV99  | Betapapillomavirus   | Betapapillomavirus 1   | Homo sapiens            |
| HG421739 | Human papillomavirus type 179            | HPV179 | Gammapapillomavirus  | Gammapapillomavirus 15 | Homo sapiens            |
| HG530535 | Human papillomavirus type 184            | HPV184 | Gammapapillomavirus  | Gammapapillomavirus 25 | Homo sapiens            |
| KM085343 | Human papillomavirus type 197            | HPV197 | Gammapapillomavirus  | Gammapapillomavirus 24 | Homo sapiens            |
| KJ913662 | Human papillomavirus type 199            | HPV199 | Gammapapillomavirus  | Gammapapillomavirus 12 | Homo sapiens            |
| MG571090 | Leptonychotes weddellii papillomavirus 1 | LwPV1  | Unclassified         | Unclassified           | Leptonychotes weddellii |
| MG571089 | Leptonychotes weddellii papillomavirus 2 | LwPV2  | Unclassified         | Unclassified           | Leptonychotes weddellii |
| MG571093 | Leptonychotes weddellii papillomavirus 3 | LwPV3  | Unclassified         | Unclassified           | Leptonychotes weddellii |
| MG571095 | Leptonychotes weddellii papillomavirus 4 | LwPV4  | Unclassified         | Unclassified           | Leptonychotes weddellii |
| MG571094 | Leptonychotes weddellii papillomavirus 5 | LwPV5  | Unclassified         | Unclassified           | Leptonychotes weddellii |
| MG571091 | Leptonychotes weddellii papillomavirus 6 | LwPV6  | Unclassified         | Unclassified           | Leptonychotes weddellii |
| MG571092 | Leptonychotes weddellii papillomavirus 7 | LwPV7  | Unclassified         | Unclassified           | Leptonychotes weddellii |
| AY904722 | Lynx rufus papillomavirus 1              | LrPV1  | Lambdapapillomavirus | Lambdapapillomavirus 1 | Lynx rufus              |
| EU028290 | Macaca fascicularis papillomavirus 1     | MfPV1  | Betapapillomavirus   | Betapapillomavirus 1   | Macaca fascicularis     |
| EU490515 | Macaca fascicularis papillomavirus 10    | MfPV10 | Alphapapillomavirus  | Alphapapillomavirus 12 | Macaca fascicularis     |
| GQ227670 | Macaca fascicularis papillomavirus 11    | MfPV11 | Alphapapillomavirus  | Alphapapillomavirus 12 | Macaca fascicularis     |
| GU014531 | Macaca fascicularis papillomavirus 2     | MfPV2  | Betapapillomavirus   | Betapapillomavirus 6   | Macaca fascicularis     |
| EF558839 | Macaca fascicularis papillomavirus 3     | MfPV3  | Alphapapillomavirus  | Alphapapillomavirus 12 | Macaca fascicularis     |
| EF558841 | Macaca fascicularis papillomavirus 4     | MfPV4  | Alphapapillomavirus  | Alphapapillomavirus 12 | Macaca fascicularis     |
| EF558843 | Macaca fascicularis papillomavirus 5     | MfPV5  | Alphapapillomavirus  | Alphapapillomavirus 12 | Macaca fascicularis     |
| EF558840 | Macaca fascicularis papillomavirus 6     | MfPV6  | Alphapapillomavirus  | Alphapapillomavirus 12 | Macaca fascicularis     |
| EF558838 | Macaca fascicularis papillomavirus 7     | MfPV7  | Alphapapillomavirus  | Alphapapillomavirus 12 | Macaca fascicularis     |
| EF558842 | Macaca fascicularis papillomavirus 8     | MfPV8  | Alphapapillomavirus  | Alphapapillomavirus 12 | Macaca fascicularis     |



|          |                                                 |        |                            |                              |                           |
|----------|-------------------------------------------------|--------|----------------------------|------------------------------|---------------------------|
| EU490516 | Macaca fascicularis papillomavirus 9            | MFPV9  | Alphapapillomavirus        | Alphapapillomavirus 12       | Macaca fascicularis       |
| KT944080 | Macaca fuscata papillomavirus 1                 | MfuPV1 | Alphapapillomavirus        | Alphapapillomavirus          | Macaca fuscata            |
| M60184   | Macaca mulata papillomavirus 1                  | MmPV1  | Alphapapillomavirus        | Alphapapillomavirus 12       | Macaca mulata             |
| DQ664501 | Mastomys coucha papillomavirus 2                | McPV2  | Pipapillomavirus           | Pipapillomavirus 2           | Mastomys coucha           |
| U01834   | Mastomys natalensis papillomavirus 1            | MnPV1  | lotapapillomavirus         | lotapapillomavirus 1         | Mastomys natalensis       |
| E15111   | Mesocricetus auratus papillomavirus 1           | MaPV1  | Pipapillomavirus           | Pipapillomavirus 1           | Mesocricetus auratus      |
| DQ269468 | Micromys minutus papillomavirus 1               | MmiPV1 | Pipapillomavirus           | Pipapillomavirus 2           | Micromys minutus          |
| JQ814848 | Miniopterus schreibersii papillomavirus 1       | MscPV1 | Unclassified               | Unclassified                 | Miniopterus schreibersii  |
| JQ692938 | Miniopterus schreibersii papillomavirus 2       | MscPV2 | Dyotapapillomavirus        | Dyotapapillomavirus 1        | Miniopterus schreibersii  |
| HQ262535 | Morelia spilota papillomavirus 1                | MsPV1  | Dyomupapillomavirus        | Dyomupapillomavirus 1        | Morelia spilota           |
| GU808564 | Mus musculus papillomavirus type 1              | MmuPV1 | Pipapillomavirus           | Pipapillomavirus 2           | Mus musculus              |
| KF006988 | Mustela putorius papillomavirus 1               | MpPV1  | Taupapillomavirus          | Taupapillomavirus            | Mustela putorius          |
| JQ814847 | Myotis ricketti papillomavirus 1                | MrPV1  | Unclassified               | Unclassified                 | Myotis ricketti           |
| M11910   | Odocoileus virginianus papillomavirus 1         | OvPV1  | Deltapapillomavirus        | Deltapapillomavirus 2        | Odocoileus virginianus    |
| AF227240 | Oryctolagus cuniculus papillomavirus 2          | OcPV1  | Kappapapillomavirus        | Kappapapillomavirus 1        | Oryctolagus cuniculus     |
| U83594   | Ovis aries papillomavirus 1                     | OaPV1  | Deltapapillomavirus        | Deltapapillomavirus 3        | Ovis aries                |
| U83595   | Ovis aries papillomavirus 2                     | OaPV2  | Deltapapillomavirus        | Deltapapillomavirus 3        | Ovis aries                |
| FJ796965 | Ovis aries papillomavirus 3                     | OaPV3  | Dyokappapapillomavirus     | Dyokappapapillomavirus 1     | Ovis aries                |
| KX954121 | Ovis aries papillomavirus 4                     | OaPV4  | Deltapapillomavirus        | Unclassified                 | Ovis aries                |
| X62844   | Pan paniscus papillomavirus 1                   | PpPV1  | Alphapapillomavirus        | Alphapapillomavirus 10       | Pan paniscus              |
| AY904724 | Panthera leo persica papillomavirus 1           | PlpPV1 | Lambdapapillomavirus       | Lambdapapillomavirus 1       | Panthera leo persica      |
| JF304764 | papio hamadryas papillomavirus 1                | PhPV1  | Alphapapillomavirus        | Alphapapillomavirus 12       | Papio hamadryas           |
| JF755418 | Peromyscus papillomavirus 1                     | PmPV1  | lotapapillomavirus         | lotapapillomavirus           | Peromyscus                |
| GU117621 | Phocoena phocoena papillomavirus                | PphPV1 | Omikronpapillomavirus      | Omikronpapillomavirus 1      | Phocoena phocoena         |
| GU117622 | Phocoena phocoena papillomavirus                | PphPV2 | Upsilonpapillomavirus      | Upsilonpapillomavirus 3      | Phocoena phocoena         |
| GU117623 | Phocoena phocoena papillomavirus                | PphPV4 | Dyopipapillomavirus        | Dyopipapillomavirus 1        | Phocoena phocoena         |
| AJ238373 | Phocoena spinipinnis papillomavirus             | PsPV1  | Omikronpapillomavirus      | Omikronpapillomavirus 1      | Phocoena spinipinnis      |
| HG939559 | Phodopus sungorus papillomavirus type 1         | PsuPV1 | Pipapillomavirus           | Pipapillomavirus 1           | Phodopus sungorus         |
| AY763115 | Procyon lotor papillomavirus 1                  | PIPV1  | Lambdapapillomavirus       | Lambdapapillomavirus 4       | Procyon lotor             |
| AF502599 | Psittacus erithacus papillomavirus 1            | PePV1  | Thetapapillomavirus        | Thetapapillomavirus 1        | Psittacus erithacus       |
| KT932713 | Pudu papillomavirus 1                           | PpuPV1 | Unclassified               | Unclassified                 | Pudu puda                 |
| AY904723 | Puma concolor papillomavirus 1                  | PcPV1  | Lambdapapillomavirus       | Lambdapapillomavirus 1       | Puma concolor             |
| KJ173785 | Pygoscelis adeliae papillomavirus               | PaPV1  | Treisepsilonpapillomavirus | Treisepsilonpapillomavirus 1 | Pygoscelis adeliae        |
| MF168943 | Pygoscelis adeliae papillomavirus 2             | PaPV2  | Treisepsilonpapillomavirus | Unclassified                 | Pygoscelis adeliae        |
| AF443292 | Rangifer tarandus papillomavirus 1              | RtPV1  | Deltapapillomavirus        | Deltapapillomavirus 1        | Rangifer tarandus         |
| KC810012 | Rangifer tarandus papillomavirus 2              | RtPV2  | Xipapillomavirus           | Xipapillomavirus 3           | Rangifer tarandus         |
| GQ180114 | Rattus norvegicus papillomavirus 1              | RnPV1  | Pipapillomavirus           | Pipapillomavirus 2           | Rattus norvegicus         |
| HQ625441 | Rattus norvegicus papillomavirus 2              | RnPV2  | lotapapillomavirus         | lotapapillomavirus 1         | Rattus norvegicus         |
| KT945134 | Rattus norvegicus papillomavirus 3              | RnPV3  | lotapapillomavirus         | lotapapillomavirus 1         | Rattus norvegicus         |
| KC858266 | Rhinolophus ferrumequinum papillomavirus type 1 | RfPV1  | Treisdeltapapillomavirus   | Treisdeltapapillomavirus 1   | Rhinolophus ferrumequinum |
| DQ366842 | Rousettus aegyptiacus papillomavirus 1          | RaPV1  | Psipapillomavirus          | Psipapillomavirus 1          | Rousettus aegyptiacus     |
| KC876045 | Rupicapra rupicapra papillomavirus 1            | RrPV1  | Dyokappapapillomavirus     | Dyokappapapillomavirus 2     | Rupicapra rupicapra       |
| KT626573 | Rusa alfredi papillomavirus 1                   | RaIPV1 | Deltapapillomavirus        | Deltapapillomavirus          | Rusa alfredi              |
| KP757765 | Rusa timorensis papillomavirus 1                | RtiPV1 | Unclassified               | Unclassified                 | Rusa timorensis           |
| JF304765 | Saimiri sciureus papillomavirus 1               | SscPV1 | Dyoomikronpapillomavirus   | Dyoomikronpapillomavirus 1   | Saimiri sciureus          |
| JF304766 | Saimiri sciureus papillomavirus 2               | SscPV2 | Dyoomikronpapillomavirus   | Dyoomikronpapillomavirus 1   | Saimiri sciureus          |
| JF304767 | Saimiri sciureus papillomavirus 3               | SscPV3 | Dyoomikronpapillomavirus   | Dyoomikronpapillomavirus 1   | Saimiri sciureus          |
| EF395818 | Sus scrofa papillomavirus 1                     | SsPV1  | Dyodeltapapillomavirus     | Dyodeltapapillomavirus 1     | Sus scrofa                |
| KY817993 | Sus scrofa papillomavirus 2                     | SsPV2  | Unclassified               | Unclassified                 | Sus scrofa                |
| K02708   | Sylvilagus floridanus papillomavirus 1          | SfPV1  | Kappapapillomavirus        | Kappapapillomavirus 2        | Sylvilagus floridanus     |

|          |                                                        |       |                               |                                |                                       |
|----------|--------------------------------------------------------|-------|-------------------------------|--------------------------------|---------------------------------------|
| KC460987 | <i>Talpa europaea</i> papillomavirus 1                 | TePV1 | <i>Dyophipapillomavirus</i>   | <i>Dyophipapillomavirus 1</i>  | <i>Talpa europaea</i>                 |
| AY609301 | <i>Trichechus manatus latirostris</i> papillomavirus 1 | TmPV1 | <i>Rhopapillomavirus</i>      | <i>Rhopapillomavirus 1</i>     | <i>Trichechus manatus latirostris</i> |
| JN709473 | <i>Trichechus manatus latirostris</i> papillomavirus 2 | TmPV2 | <i>Rhopapillomavirus</i>      | <i>Rhopapillomavirus 1</i>     | <i>Trichechus manatus latirostris</i> |
| KP205502 | <i>Trichechus manatus</i> papillomavirus 3             | TmPV3 | <i>Rhopapillomavirus</i>      | <i>Rhopapillomavirus 2</i>     | <i>Trichechus manatus latirostris</i> |
| KP205503 | <i>Trichechus manatus</i> papillomavirus 4             | TmPV4 | <i>Rhopapillomavirus</i>      | <i>Rhopapillomavirus 2</i>     | <i>Trichechus manatus latirostris</i> |
| EU240894 | <i>Tursiops truncatus</i> papillomavirus 1             | TtPV1 | <i>Upsilonpapillomavirus</i>  | <i>Upsilonpapillomavirus 1</i> | <i>Tursiops truncatus</i>             |
| AY956402 | <i>Tursiops truncatus</i> papillomavirus 2             | TtPV2 | <i>Upsilonpapillomavirus</i>  | <i>Upsilonpapillomavirus 2</i> | <i>Tursiops truncatus</i>             |
| EU240895 | <i>Tursiops truncatus</i> papillomavirus 3             | TtPV3 | <i>Upsilonpapillomavirus</i>  | <i>Upsilonpapillomavirus 1</i> | <i>Tursiops truncatus</i>             |
| JN709469 | <i>Tursiops truncatus</i> papillomavirus 4             | TtPV4 | <i>Upsilonpapillomavirus</i>  | <i>Upsilonpapillomavirus 1</i> | <i>Tursiops truncatus</i>             |
| JN709470 | <i>Tursiops truncatus</i> papillomavirus 5             | TtPV5 | <i>Omikronpapillomavirus</i>  | <i>Omikronpapillomavirus 1</i> | <i>Tursiops truncatus</i>             |
| JN709471 | <i>Tursiops truncatus</i> papillomavirus 6             | TtPV6 | <i>Omikronpapillomavirus</i>  | <i>Omikronpapillomavirus 1</i> | <i>Tursiops truncatus</i>             |
| JN709472 | <i>Tursiops truncatus</i> papillomavirus 7             | TtPV7 | <i>Upsilonpapillomavirus</i>  | <i>Upsilonpapillomavirus 1</i> | <i>Tursiops truncatus</i>             |
| DQ180494 | <i>Uncia uncia</i> papillomavirus 1                    | UuPV1 | <i>Lambdapapillomavirus</i>   | <i>Lambdapapillomavirus 1</i>  | <i>Uncia uncia</i>                    |
| EF536349 | <i>Ursus maritimus</i> papillomavirus 1                | UmPV1 | <i>Omegapapillomavirus</i>    | <i>Omegapapillomavirus 1</i>   | <i>Ursus maritimus</i>                |
| KF857586 | <i>Vulpes vulpes</i> papillomavirus 1                  | VvPV1 | <i>Treisetapapillomavirus</i> | <i>Treisetapapillomavirus</i>  | <i>Vulpes vulpes</i>                  |
| HQ293213 | <i>Zalophus californianus</i> papillomavirus 1         | ZcPV1 | <i>Dyonupapillomavirus</i>    | <i>Dyonupapillomavirus 1</i>   | <i>Zalophus californianus</i>         |
